# Supplementary material for: Default Mode Network in the Effects of Δ9-Tetrahydrocannabinol (THC) on Human Executive Function
Source: PubMed Central journal article supplement (PMC3729458; doi:10.1371/journal.pone.0070074), 2013-07-31
Supplement: pone.0070074.s001.pdf [file pone.0070074.s001.pdf]

**Figure S1**

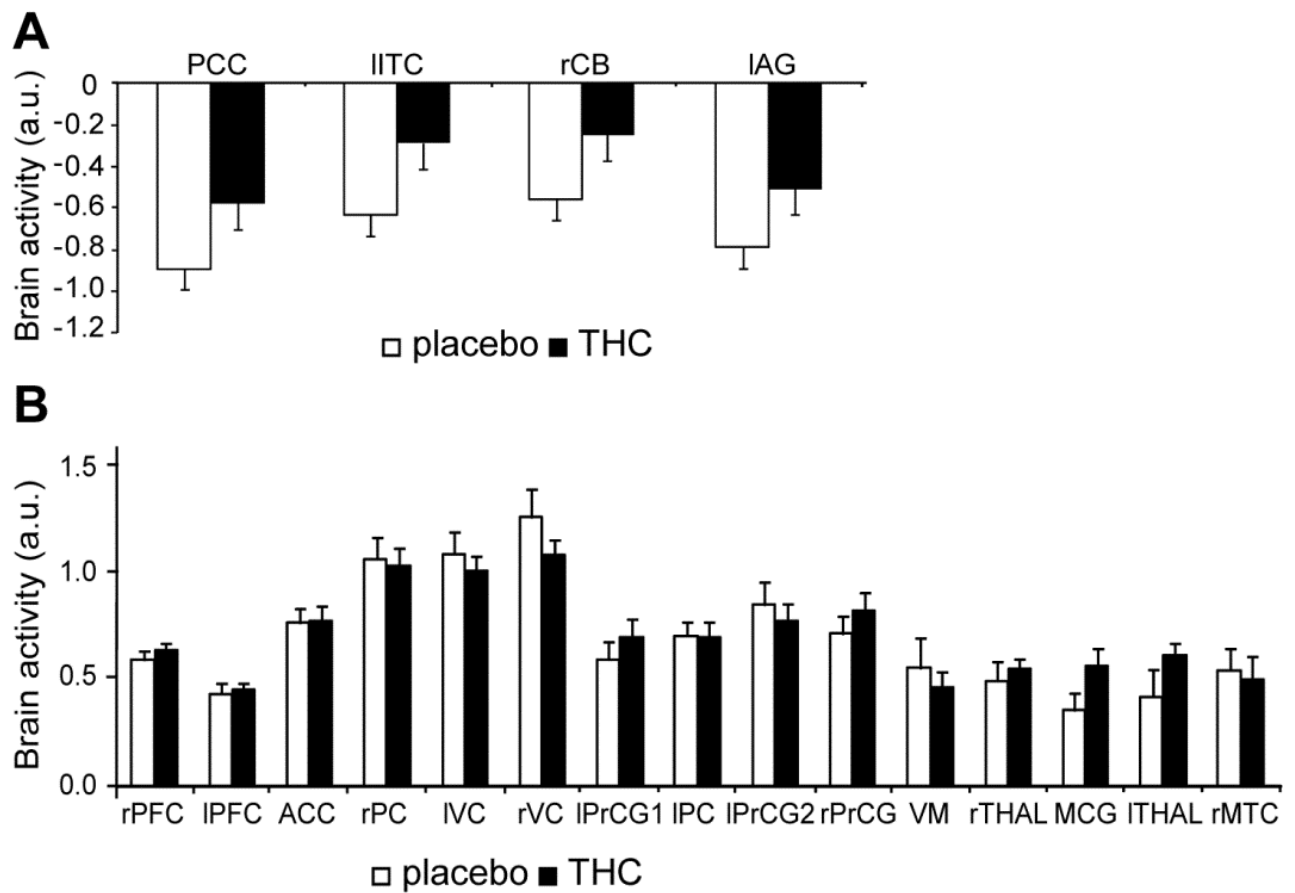

**Figure S1** Effects of THC administration on activity in regions of interest (ROIs). The figure shows brain activity in **A**, TID regions, and **B**, TIA regions, after administration of placebo (white) and THC (black) ( $n = 20$ ; mean  $\pm$  SEM). Full ROI names are given in Figure 3. TIA, task-induced activation; TID, task-induced deactivation; a.u., arbitrary units.
