# Supplementary material for: Default Mode Network in the Effects of Δ9-Tetrahydrocannabinol (THC) on Human Executive Function
Source: PubMed Central journal article supplement (PMC3729458; doi:10.1371/journal.pone.0070074), 2013-07-31
Supplement: pone.0070074.s002.pdf [file pone.0070074.s002.pdf]

**Figure S2**

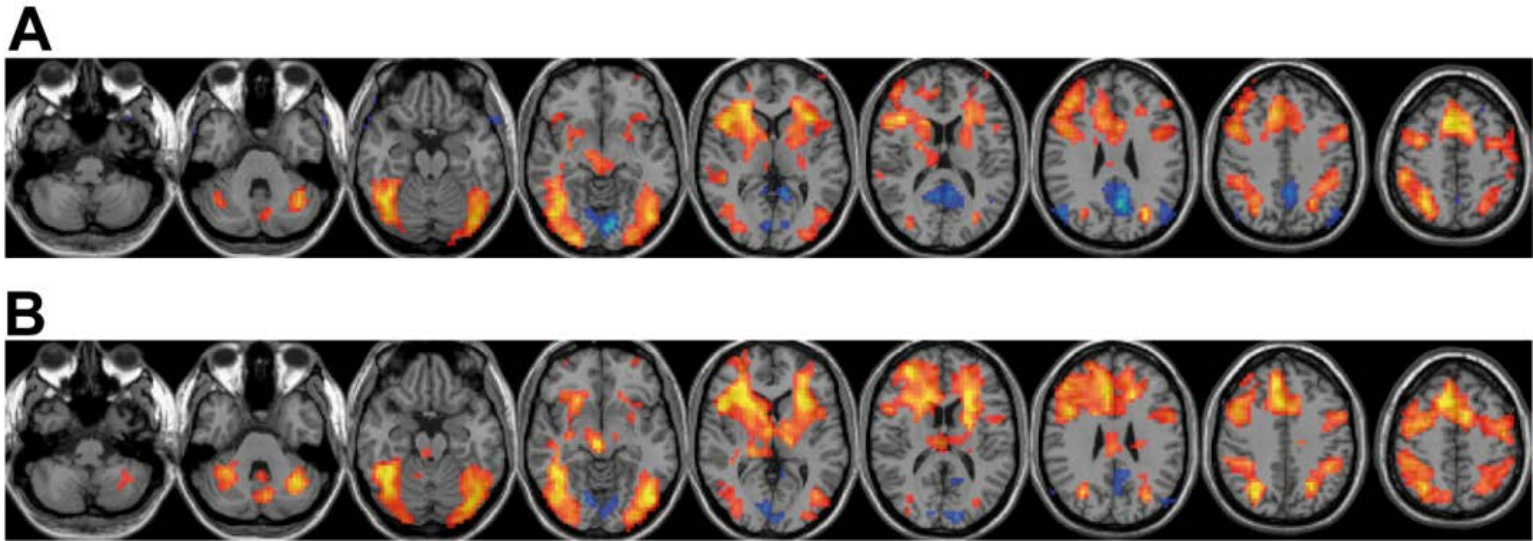

**Figure S2** Activity patterns during performance of CPT-IP (baseline: rest). The figure shows activity after administration of **A**, placebo, and **B**, THC ( $n = 20$ ;  $t > |4.6|$ ,  $p < 0.0001$  uncorrected, clusters  $\geq 10$  voxels).
