# Supplementary material for: Default Mode Network in the Effects of Δ9-Tetrahydrocannabinol (THC) on Human Executive Function
Source: PubMed Central journal article supplement (PMC3729458; doi:10.1371/journal.pone.0070074), 2013-07-31
Supplement: pone.0070074.s003.pdf [file pone.0070074.s003.pdf]

**Figure S3**

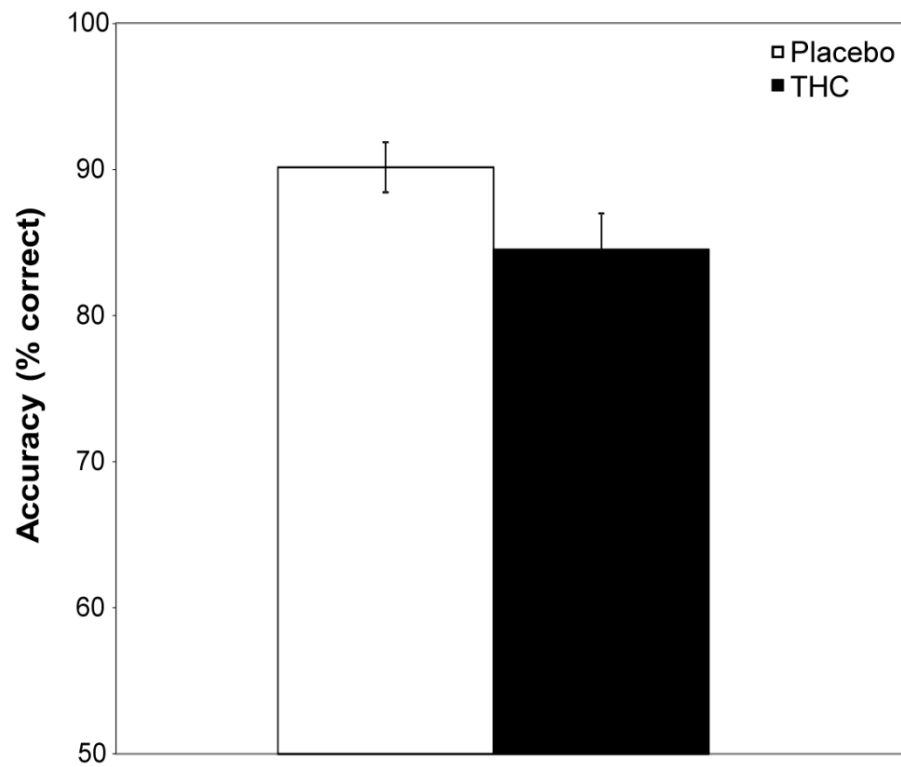

**Figure S3** Task performance in percentage of correct responses after placebo and THC administration ( $n = 20$ ; mean  $\pm$  SEM). THC administration significantly decreased the percentage of correct responses (from  $90.5 \pm 1.7\%$  to  $85.0 \pm 2.5\%$ ,  $t(19) = 2.95$ ,  $p = 0.008$ ).
